# Supplementary material for: Pumice as a Novel Natural Heterogeneous Catalyst for the Designation of 3,4-Dihydropyrimidine-2-(1H)-ones/thiones under Solvent-Free Conditions
Source: MDPI journal article supplement (doi:10.3390/molecules27186044), 2022-09-16
Supplement: s1 [file s1]

Supplementary Materials

# Pumice as a Novel Natural Heterogeneous Catalyst for the Designation of 3,4-Dihydropyrimidine-2-(1H)-ones/thiones under Solvent-Free Conditions

Hany M. Abd El-Lateef <sup>1,2,\*</sup>, Mohamed Gouda <sup>1,\*</sup>, Mai M. Khalaf <sup>1,2</sup>, Saad Shaaban <sup>1,3</sup>, Nadia A. A. Elkanzi <sup>4,5</sup>, El Sayed A. Saber <sup>6</sup>, Antar A. Abdelhamid <sup>2,7</sup> and Ali M. Ali <sup>2</sup>

<sup>1</sup> Department of Chemistry, College of Science, King Faisal University, Al-Ahsa 31982, Saudi Arabia

<sup>2</sup> Department of Chemistry, Faculty of Science, Sohag University, Sohag 82534, Egypt

<sup>3</sup> Chemistry Department, Faculty of Science, Mansoura University, Mansoura 35516, Egypt

<sup>4</sup> Chemistry department, College of Science, Jouf University, Sakaka P.O. Box 2014, Saudi Arabia

<sup>5</sup> Chemistry Department, Faculty of Science, Aswan University, Aswan P.O. Box 81528, Egypt

<sup>6</sup> Geology Department, Faculty of Science, Sohag University, Sohag 82534, Egypt

<sup>7</sup> Chemistry Department, Faculty of Science, Albaha University, Albaha P.O. Box 1988, Saudi Arabia

\* Correspondence: hmahmed@kfu.edu.sa or hany\_shubra@science.sohag.edu.eg (H.M.A.E.-L.); mgoudaam@kfu.edu.sa (M.G.)

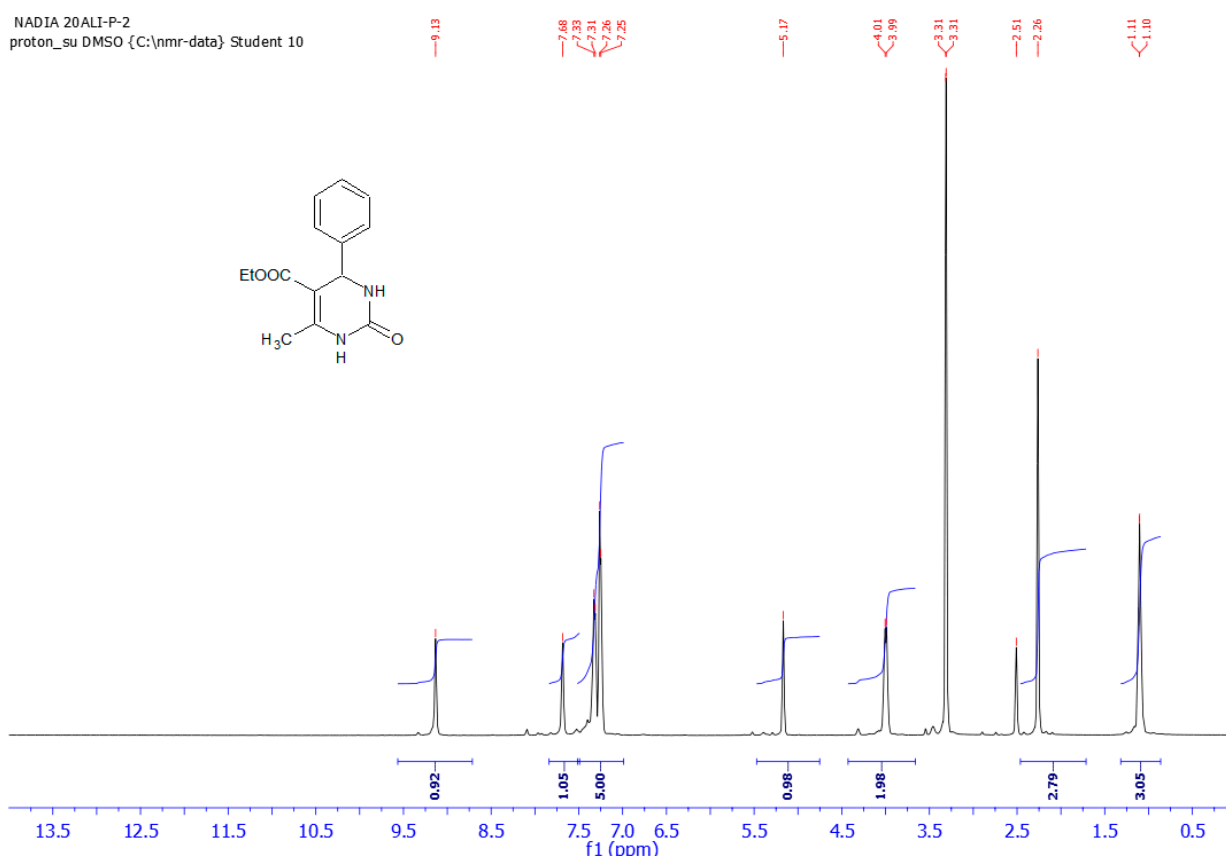

Figure S1. <sup>1</sup>H-NMR Spectrum of compound 2a.

NADIA 20ALI-P-2  
c13\_su DMSO {C:\nmr-data} Student 10

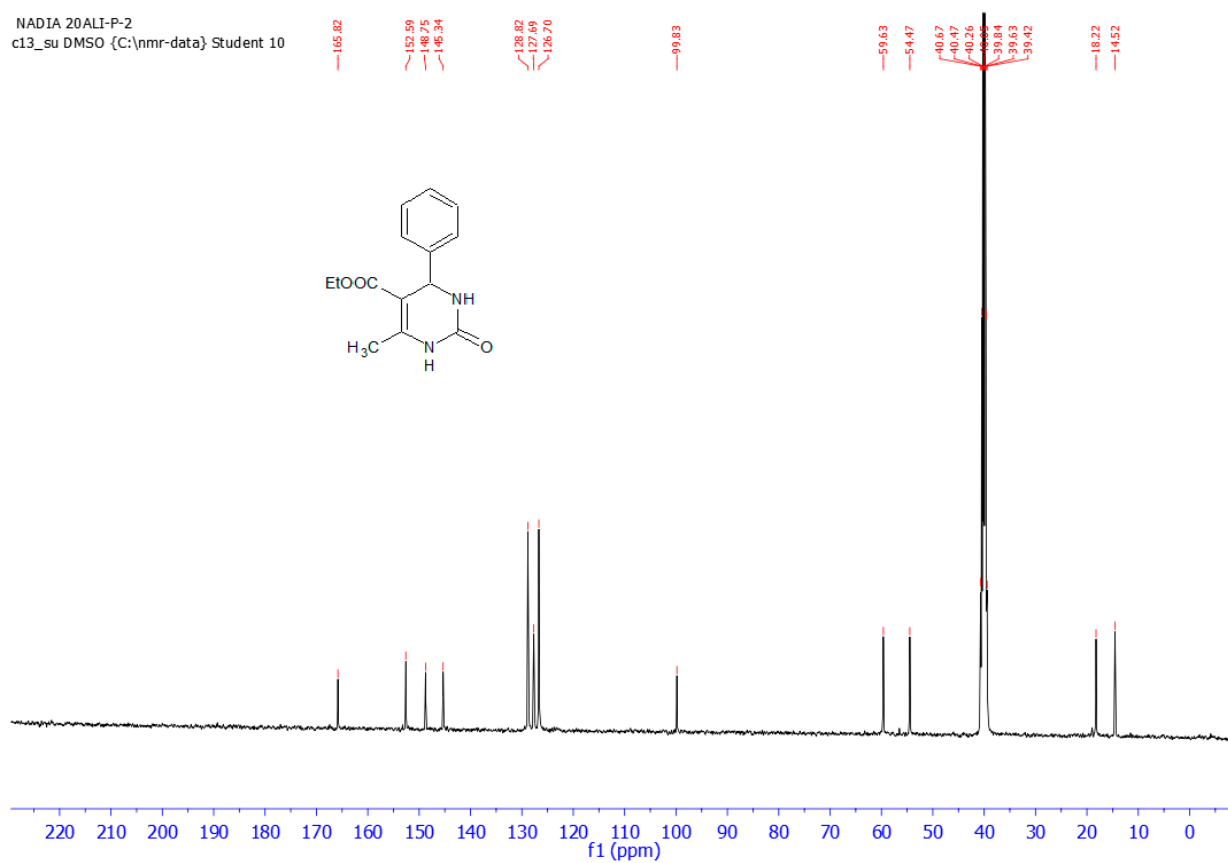

**Figure S2.**  $^{13}\text{C}$ -NMR Spectrum of compound 2a.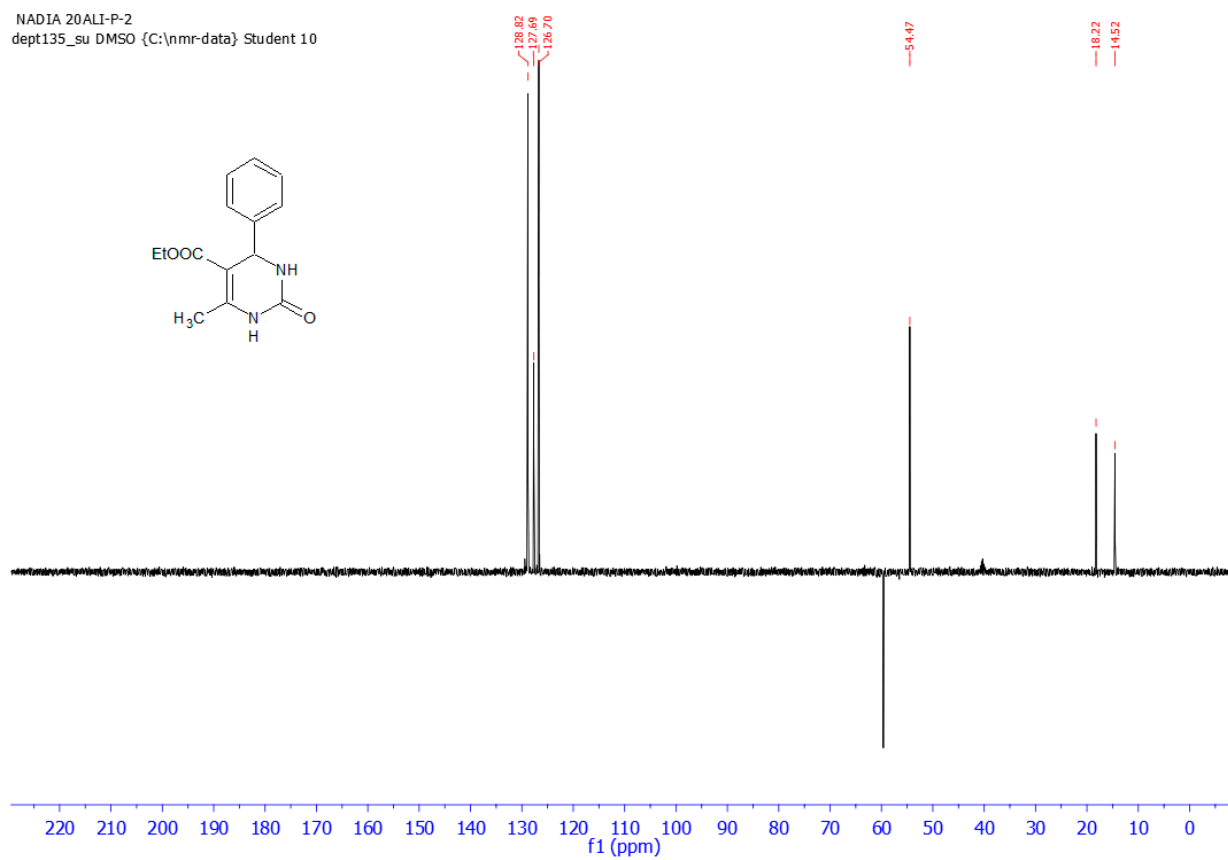**Figure S3.** Dept-135 Spectrum of compound 2a.

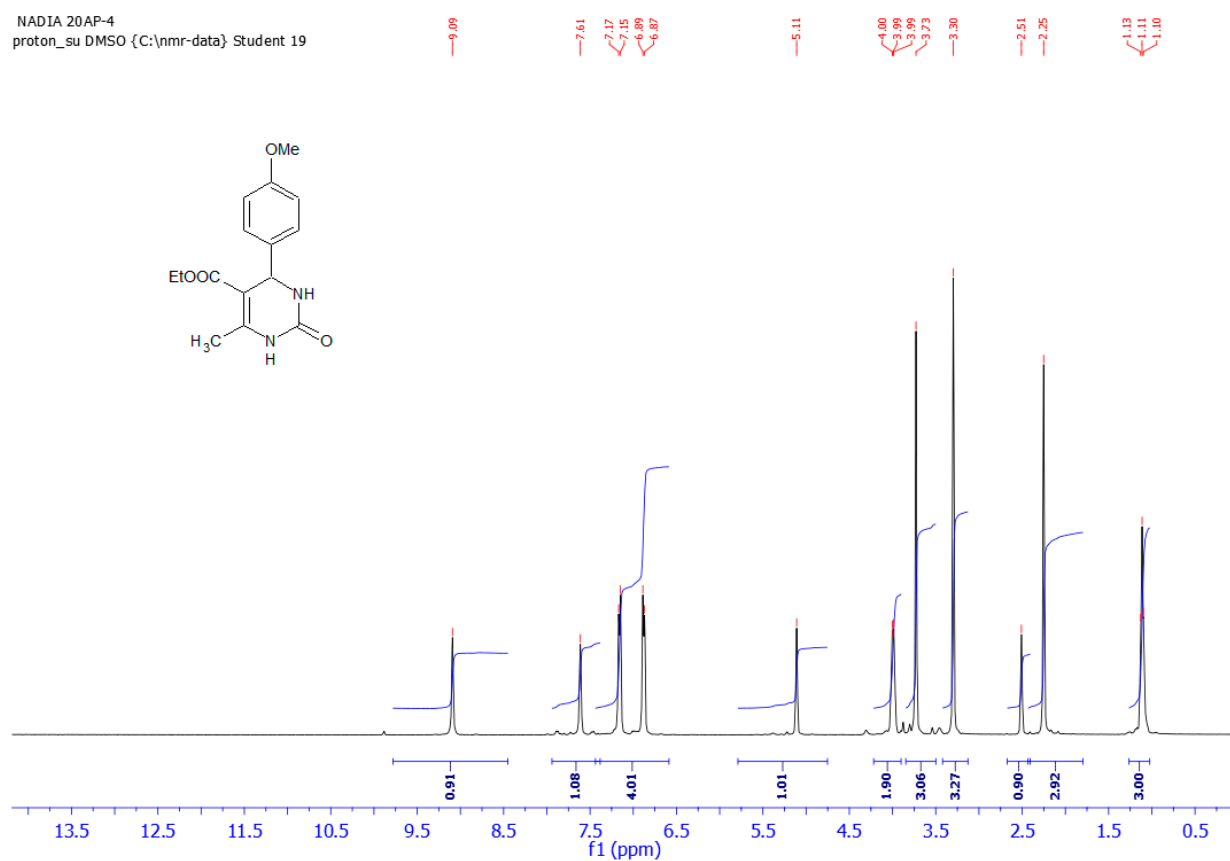

Figure S4. <sup>1</sup>H-NMR Spectrum of compound 5a.

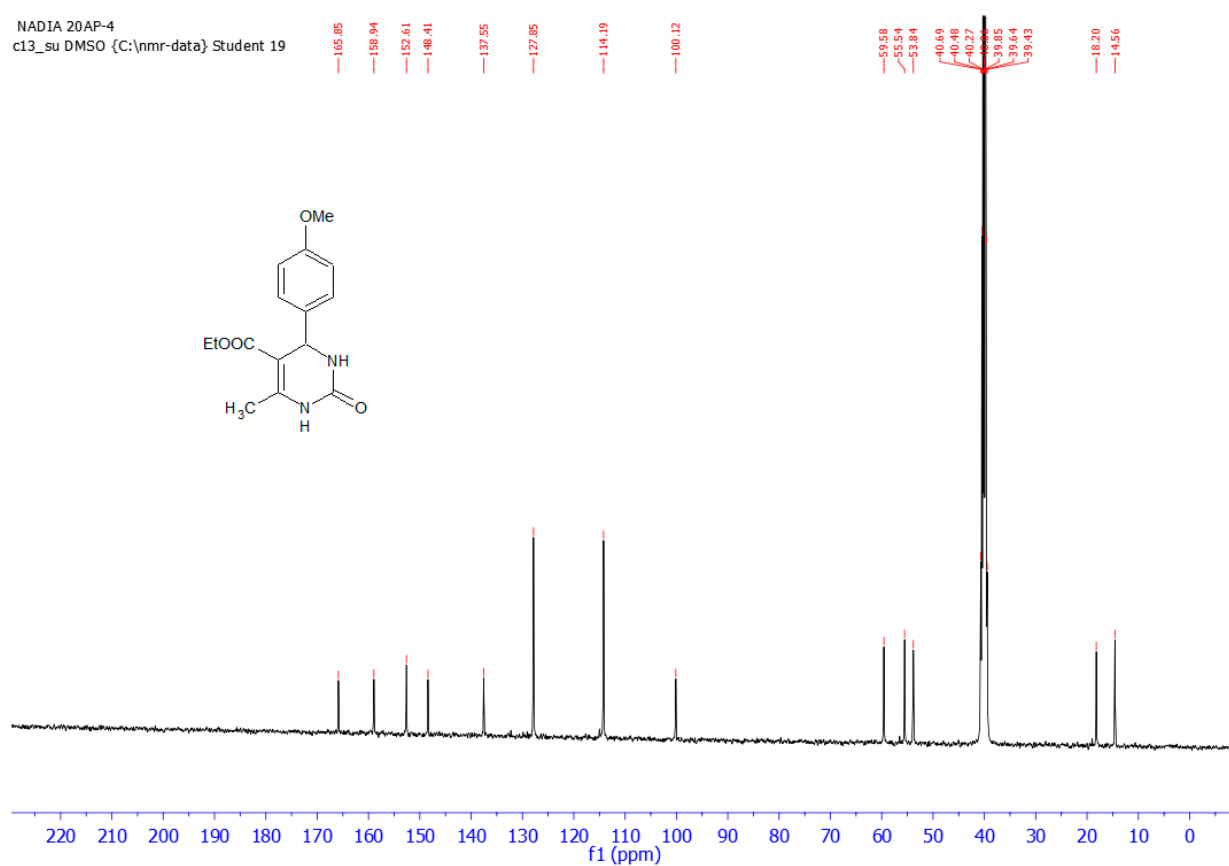

Figure S5. <sup>13</sup>C-NMR Spectrum of compound 5a.

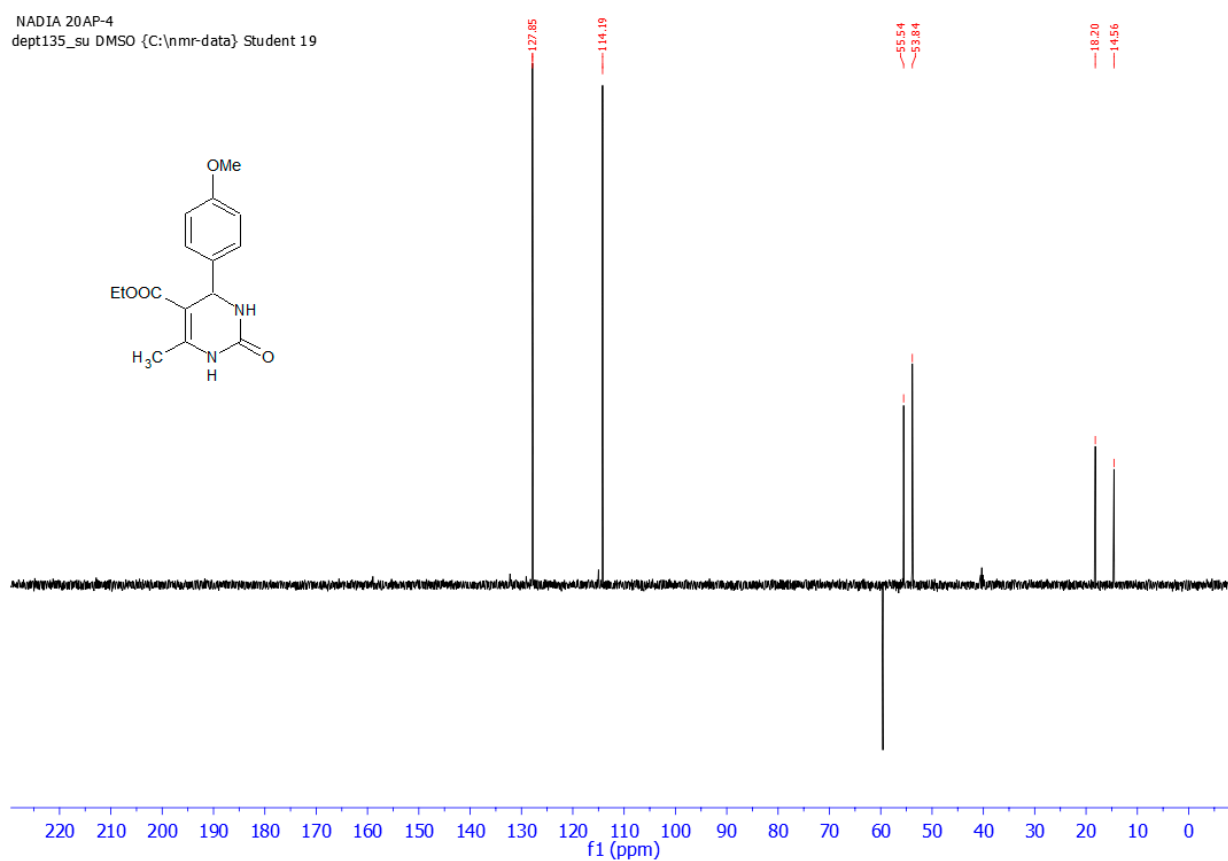

Figure S6. Dept-135 Spectrum of compound 5a.

NADIA 20ALI-P-1  
proton\_su DMSO {C:\nmr-data} Student 11

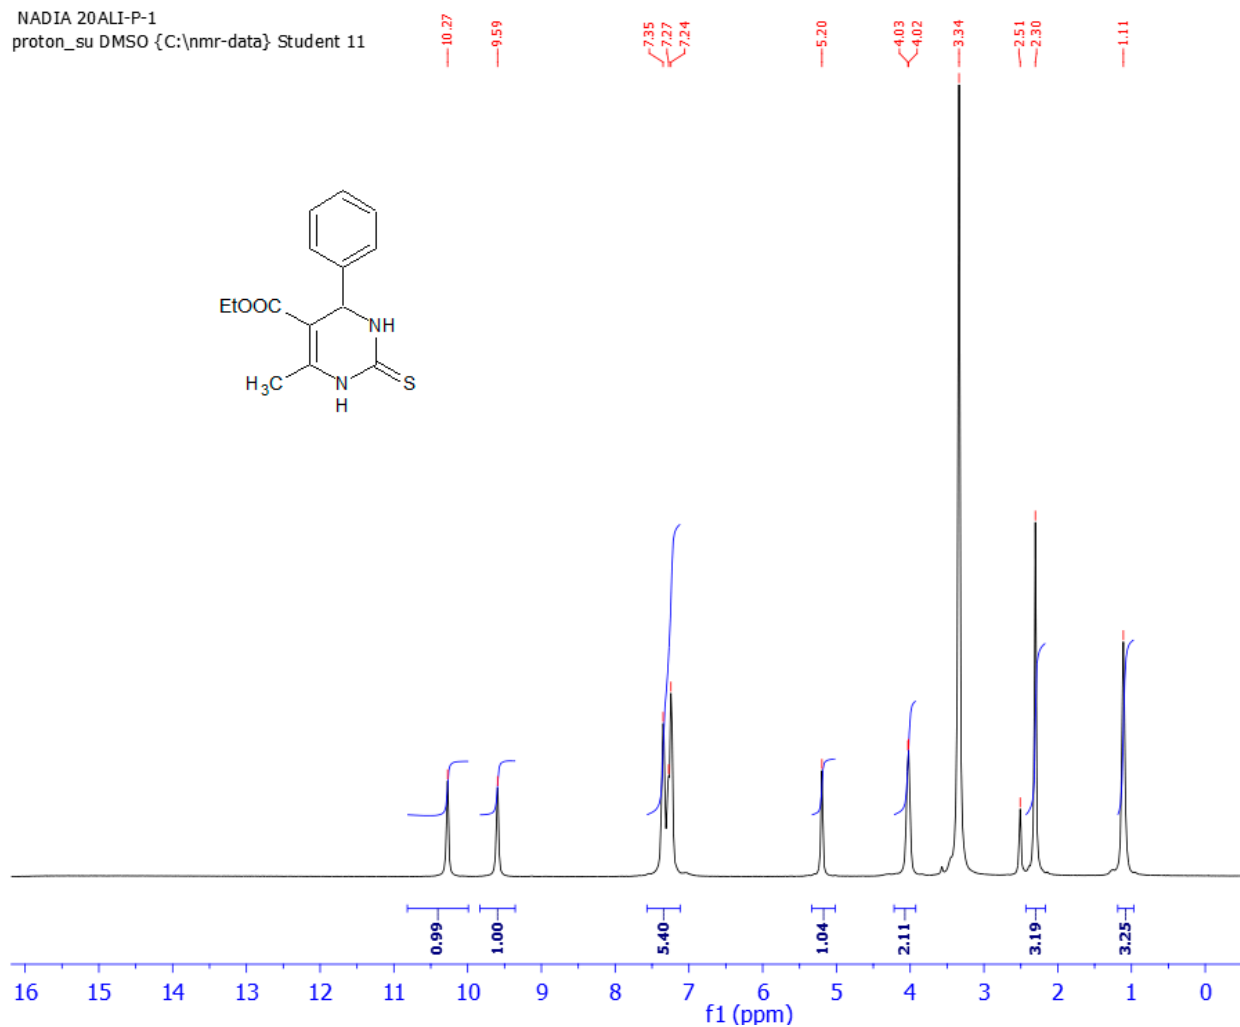

Figure S7. <sup>1</sup>H-NMR Spectrum of compound 2b.

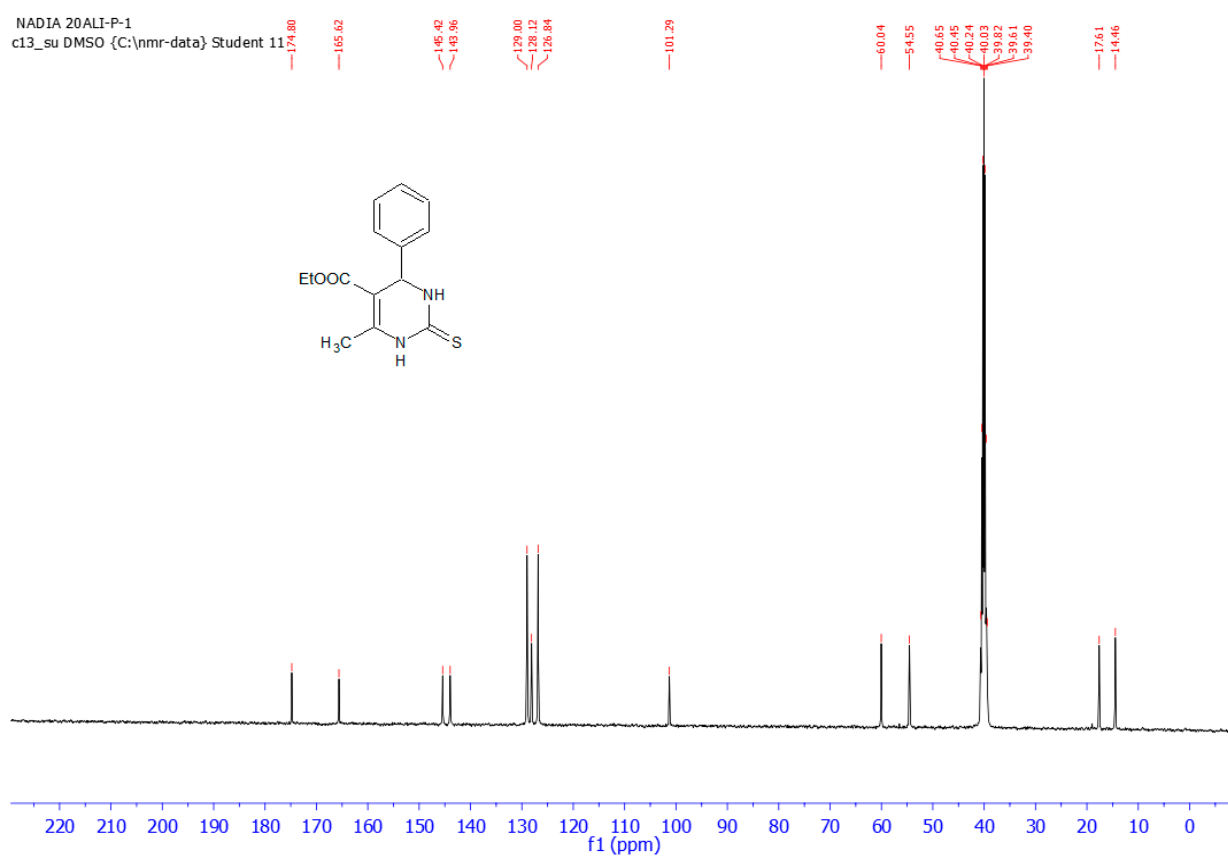

Figure S8. <sup>13</sup>C-NMR Spectrum of compound 2b.



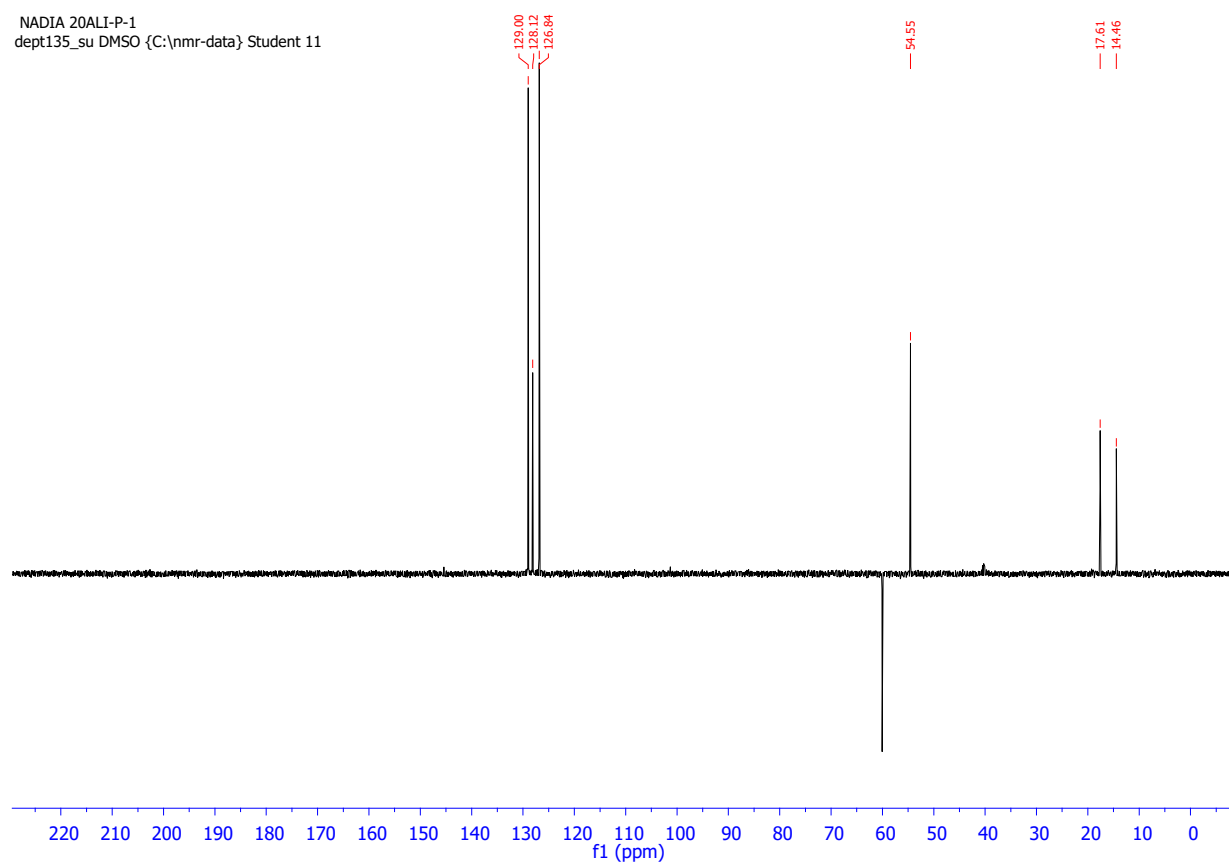

Figure S9. Dept-135 Spectrum of compound 2b.
